# Supplementary material
Source: ML conference proceedings conference paper supplement (https://openreview.net/forum?id=3gamyee9Yh)
Supplement: supplementary_material [file attachment]

---

# Supplementary Material:

## QuantSR: Accurate Low-bit Quantization for Efficient Image Super-Resolution

---

Anonymous Author(s)

Affiliation

Address

email

### 1 More Quantitative Results

In the supplementary materials, we provide additional detailed results of our QuantSR to demonstrate its comprehensive advantages in accuracy and efficiency.

#### 1.1 Implementations

For the implementation of various methods, we have strived to adhere as closely as possible to the results and official code provided in their respective papers. Specifically, when using the same settings as QuantSR, we directly utilized the reported results from the paper [4, 2]. When different settings were employed, we aligned our model and training setup with the official code ([5] for PAMS and [2] for CADyQ), trained the model accordingly, and tested the obtained results.

#### 1.2 Accuracy Results

In terms of accuracy, we present the results of the QuantSR approach. For each QuantSR variant (including QuantSR-C and QuantSR-T with different bit widths), four weight-sharing variants with varying numbers of blocks are included to achieve flexible inference with resource adaptation while breaking the accuracy upper limit. For QuantSR-C, variants with 32, 16, and 8 blocks are simultaneously trained, and for fairness, a 16-block variant equivalent to full precision is used for comparison in the paper. As for QuantSR-T, lighter variants with 4, 2, and 1 block(s) are used since SwinIR typically involves higher computational complexity, and smaller variants are advantageous for practical edge applications. From the complete results in Tab. 1, it can be observed that the largest variants almost match the full precision performance, and some 4-bit results even surpass it. This demonstrates the powerful potential of our proposed QuantSR approach in unleashing the accuracy of quantized SR networks. Furthermore, even considering the smallest variants, the accuracy remains at a reasonable level, albeit with the inference efficiency of the model pushed to the extreme.

#### 1.3 Efficiency Results

In terms of efficiency, we present comprehensive results in Tab. 2, including QuantSR-T. To obtain more realistic estimates, we compute the FLOPs and storage savings of the quantization portion as  $\frac{b}{32}$ , where  $b$  represents the quantization bit-width. We found that due to the combined improvements in operators and architecture, QuantSR exhibits significant reductions in computation and FLOPs, particularly for its transformer version. This implies that it holds great potential for edge applications of transformer-based SR networks.

| Method       | Scale | #Bit<br>(w/a) | #Blk | Set5  |        | Set14 |        | B100  |        | Urban100 |        | Manga109 |        |
|--------------|-------|---------------|------|-------|--------|-------|--------|-------|--------|----------|--------|----------|--------|
|              |       |               |      | PSNR  | SSIM   | PSNR  | SSIM   | PSNR  | SSIM   | PSNR     | SSIM   | PSNR     | SSIM   |
| Bicubic      | ×2    | -/-           | -    | 33.66 | 0.9299 | 30.24 | 0.8688 | 29.56 | 0.8431 | 26.88    | 0.8403 | 30.80    | 0.9339 |
| SRResNet [3] | ×2    | 32/32         | 16   | 38.00 | 0.9605 | 33.59 | 0.9171 | 32.19 | 0.8997 | 32.11    | 0.9282 | 38.56    | 0.9770 |
| SwinIR_S [6] | ×2    | 32/32         | 4    | 38.14 | 0.9611 | 33.86 | 0.9206 | 32.31 | 0.9012 | 32.76    | 0.9340 | 39.12    | 0.9783 |
| QuantSR-C    | ×2    | 4/4           | 32   | 38.04 | 0.9606 | 33.66 | 0.9185 | 32.22 | 0.9002 | 32.19    | 0.9296 | 38.90    | 0.9776 |
|              |       |               | 16   | 37.97 | 0.9603 | 33.53 | 0.9176 | 32.15 | 0.8993 | 31.91    | 0.9268 | 38.67    | 0.9772 |
|              |       |               | 8    | 37.80 | 0.9597 | 33.35 | 0.9158 | 32.04 | 0.8979 | 31.46    | 0.9221 | 38.25    | 0.9762 |
| QuantSR-T    | ×2    | 4/4           | 4    | 38.10 | 0.9604 | 33.65 | 0.9186 | 32.21 | 0.8998 | 32.20    | 0.9295 | 38.85    | 0.9774 |
|              |       |               | 2    | 37.93 | 0.9602 | 33.51 | 0.9173 | 32.14 | 0.8991 | 31.88    | 0.9262 | 38.55    | 0.9768 |
|              |       |               | 1    | 37.80 | 0.9596 | 33.31 | 0.9155 | 32.01 | 0.8973 | 31.39    | 0.9207 | 38.19    | 0.9759 |
| QuantSR-C    | ×2    | 2/2           | 32   | 37.70 | 0.9594 | 33.21 | 0.9148 | 31.96 | 0.8970 | 31.11    | 0.9189 | 37.93    | 0.9754 |
|              |       |               | 16   | 37.57 | 0.9589 | 33.09 | 0.9136 | 31.84 | 0.8954 | 30.77    | 0.9149 | 37.60    | 0.9745 |
|              |       |               | 8    | 37.32 | 0.9579 | 32.88 | 0.9114 | 31.68 | 0.8930 | 30.29    | 0.9087 | 37.01    | 0.9729 |
| QuantSR-T    | ×2    | 2/2           | 4    | 37.55 | 0.9587 | 33.12 | 0.9143 | 31.89 | 0.8958 | 30.96    | 0.9172 | 37.61    | 0.9745 |
|              |       |               | 2    | 37.44 | 0.9583 | 33.02 | 0.9134 | 31.83 | 0.8952 | 30.82    | 0.9156 | 37.40    | 0.9740 |
|              |       |               | 1    | 37.33 | 0.9576 | 32.89 | 0.9119 | 31.71 | 0.8933 | 30.48    | 0.9112 | 37.04    | 0.9730 |
| Bicubic      | ×4    | -/-           | -    | 28.42 | 0.8104 | 26.00 | 0.7027 | 25.96 | 0.6675 | 23.14    | 0.6577 | 24.89    | 0.7866 |
| SRResNet [3] | ×4    | 32/32         | 16   | 32.16 | 0.8951 | 28.60 | 0.7822 | 27.58 | 0.7364 | 26.11    | 0.7870 | 30.46    | 0.9089 |
| SwinIR_S [6] | ×4    | 32/32         | 4    | 32.44 | 0.8976 | 28.77 | 0.7858 | 27.69 | 0.7406 | 26.47    | 0.7980 | 30.92    | 0.9151 |
| QuantSR-C    | ×4    | 4/4           | 32   | 32.17 | 0.8943 | 28.60 | 0.7821 | 27.59 | 0.7368 | 26.12    | 0.7885 | 30.52    | 0.9082 |
|              |       |               | 16   | 32.00 | 0.8924 | 28.50 | 0.7799 | 27.52 | 0.7342 | 25.88    | 0.7807 | 30.15    | 0.9040 |
|              |       |               | 8    | 31.75 | 0.8894 | 28.35 | 0.7763 | 27.42 | 0.7307 | 25.59    | 0.7700 | 29.73    | 0.8985 |
| QuantSR-T    | ×4    | 4/4           | 4    | 32.18 | 0.8941 | 28.63 | 0.7822 | 27.59 | 0.7367 | 26.11    | 0.7871 | 30.49    | 0.9087 |
|              |       |               | 2    | 32.02 | 0.8922 | 28.52 | 0.7795 | 27.52 | 0.7343 | 25.89    | 0.7797 | 30.20    | 0.9051 |
|              |       |               | 1    | 31.79 | 0.8891 | 28.36 | 0.7757 | 28.37 | 0.7301 | 27.41    | 0.7687 | 29.69    | 0.8982 |
| QuantSR-C    | ×4    | 2/2           | 32   | 31.47 | 0.8849 | 28.19 | 0.7725 | 27.31 | 0.7277 | 25.29    | 0.7604 | 29.16    | 0.8897 |
|              |       |               | 16   | 31.30 | 0.8819 | 28.08 | 0.7694 | 27.23 | 0.7246 | 25.13    | 0.7537 | 28.81    | 0.8844 |
|              |       |               | 8    | 31.04 | 0.8771 | 27.87 | 0.7643 | 27.11 | 0.7202 | 24.85    | 0.7423 | 28.21    | 0.8743 |
| QuantSR-T    | ×4    | 2/2           | 4    | 31.53 | 0.8845 | 28.16 | 0.7715 | 27.28 | 0.7274 | 25.26    | 0.7609 | 29.06    | 0.8898 |
|              |       |               | 2    | 31.45 | 0.8832 | 28.11 | 0.7703 | 27.25 | 0.7261 | 25.18    | 0.7575 | 28.89    | 0.8871 |
|              |       |               | 1    | 31.26 | 0.8801 | 27.97 | 0.7665 | 27.15 | 0.7223 | 24.99    | 0.7490 | 28.52    | 0.8801 |

Table 1: Full quantitative results of QuantSR. SRResNet and SwinIR-S are used as full-precision backbones. ‘w/a’ denotes the weight/activation bits. Results for variants with the same number of blocks as their full-precision counterparts are colored with red.

| Method    | #Bit<br>(w/a) | #Blk | Params (K)      |  | Ops (G)         |  | Urban100 |        |
|-----------|---------------|------|-----------------|--|-----------------|--|----------|--------|
|           |               |      | (↓ Ratio)       |  | (↓ Ratio)       |  | PSNR     | SSIM   |
| SRResNet  | 32/32         | 16   | 1,367 (0%)      |  | 90.1 (0%)       |  | 32.16    | 0.8951 |
|           |               | 32   | 451 (↓ 67.0%)   |  | 29.9 (↓ 66.9%)  |  | 32.17    | 0.8943 |
| QuantSR-C | 4/4           | 16   | 303 (↓ 77.8%)   |  | 20.2 (↓ 77.5%)  |  | 32.00    | 0.8924 |
|           |               | 8    | 230 (↓ 83.1%)   |  | 15.4 (↓ 82.9%)  |  | 31.75    | 0.8894 |
| QuantSR-C | 2/2           | 32   | 170 (↓ 87.6%)   |  | 11.5 (↓ 87.2%)  |  | 31.48    | 0.8849 |
|           |               | 16   | 161 (↓ 88.2%)   |  | 10.9 (↓ 87.9%)  |  | 31.30    | 0.8819 |
|           |               | 8    | 156 (↓ 88.6%)   |  | 10.6 (↓ 88.3%)  |  | 31.04    | 0.8771 |
| SwinIR_S  | 32/32         | 4    | 930 (0%)        |  | 56.47 (0%)      |  | 32.44    | 0.8976 |
| QuantSR-T | 4/4           | 4    | 154 (↓ 83.37%)  |  | 9.39 (↓ 83.37%) |  | 32.18    | 0.8941 |
|           |               | 2    | 98.8 (↓ 89.38%) |  | 6.03 (↓ 89.32%) |  | 32.02    | 0.8922 |
|           |               | 1    | 71.0 (↓ 92.36%) |  | 4.34 (↓ 92.31%) |  | 31.97    | 0.8891 |
| QuantSR-T | 2/2           | 4    | 50.2 (↓ 94.60%) |  | 3.08 (↓ 94.55%) |  | 31.53    | 0.8845 |
|           |               | 2    | 46.8 (↓ 94.97%) |  | 2.87 (↓ 94.92%) |  | 31.45    | 0.8832 |
|           |               | 1    | 45.1 (↓ 95.15%) |  | 2.77 (↓ 95.09%) |  | 31.26    | 0.8801 |

Table 2: Compression ratio of 2-bit and 4-bit SRResNet and SwinIR\_S (×4), and their input sizes are 3×256×256 for calculating Ops.

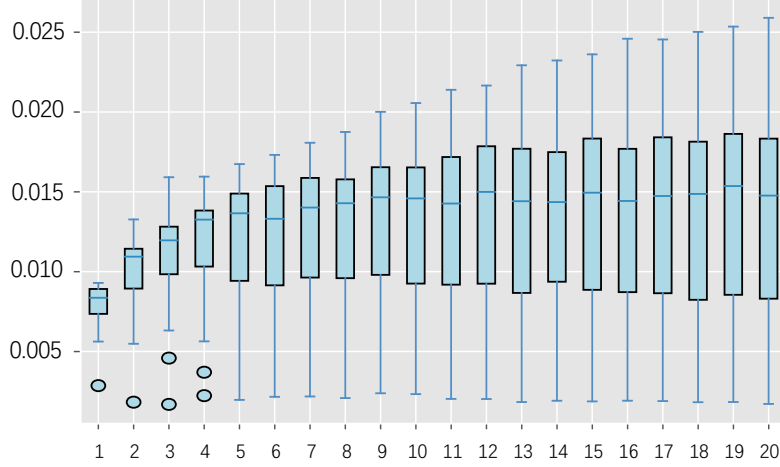

Figure 1:  $\hat{v}_b$  for weight quantizer. We use a box plot to count the change of the distribution of the learnable parameter  $\hat{v}_b$  in the entire QuantSR network with the training epoch, where for each epoch, we show the maximum value, minimum value, and variance of the parameter.

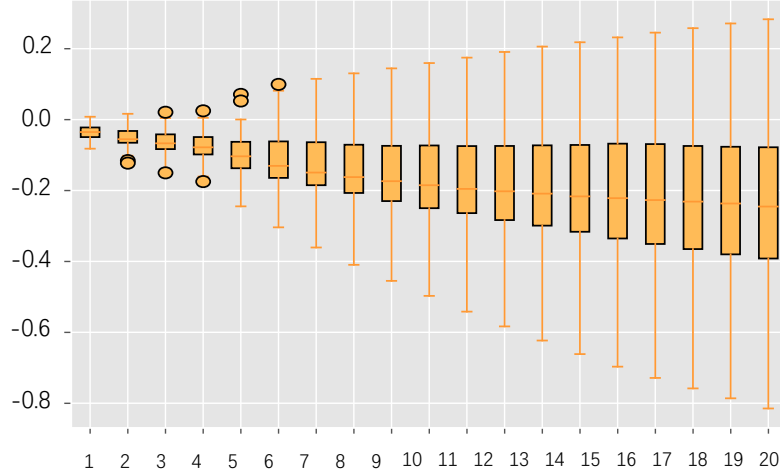

Figure 2:  $\hat{\tau}$  for activation quantizer. The form of statistics is the same as Figure 1.

## 2 More Visualization Results

### 2.1 Visualization Analysis

Figures 1 and 2 present statistics on the learnable parameters of the proposed quantizer. For the quantized step parameters  $v_b$  and  $\hat{\tau}$ , the statistics indicate that the range of these types of learnable parameters in the network generally increases with training time. Since the form of the proposed quantizer depends on these two learnable redistribution parameters, this phenomenon suggests an increasing diversity of quantizers in our QuantSR. This increase in diversity signifies that, under a limited fixed bit-width, we effectively utilize the diversity provided by quantization to significantly recover the forward representation capacity of the quantized SR model.

Figure 3 illustrates the impact of the  $\phi(\cdot)$  function on a single backward propagation and a single sample. In the proposed quantizer, the transformation function  $\phi(\cdot)$  is embedded within each quantization interval, causing no effect during the forward propagation but guiding parameter updates to better reflect the behavior of the quantizer during backward. As shown in the figure, our  $\phi(\cdot)$  function influences parameter updates within each propagation, and this influence is generally present but not significantly pronounced at the individual update level. This allows for more stable updates of

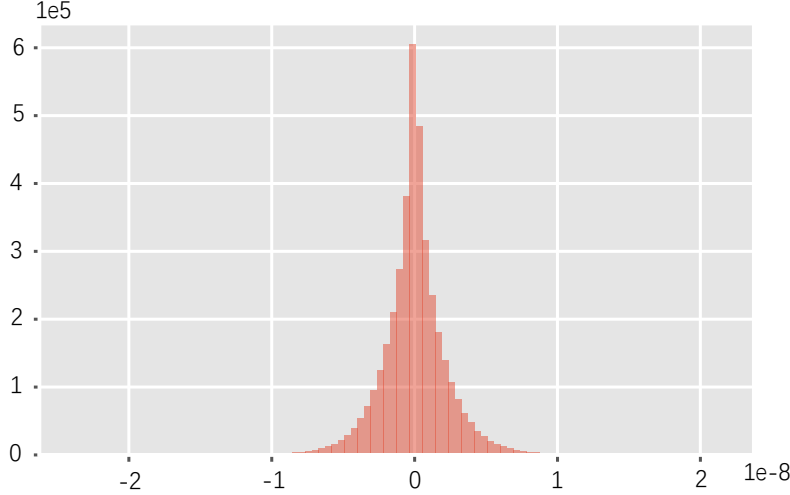

Figure 3: Gradient effect of  $\phi(\cdot)$ . In the 4-bit QuantSR-C, we present the gradient effect caused by  $\phi(\cdot)$  in the weight quantizer in a random quantized volume set. After obtaining the gradient before and after the derivation of the function, we make a pixel-wise difference between them and then statistic the value. The resulting statistic can be defined as the effect of this function on the gradient.

the quantized SR network, gradually accumulating the impact throughout the process to accurately reflect the quantizer’s influence in the final well-trained network.

In Fig. 4, we further visualize the output of the high-level feature extractor of our quantized SR model. Compared to the existing DoReFa method, our QuantSR-C and QuantSR-T exhibit clearer and richer details at the same bit-width, indicating that QuantSR has achieved better representation capacity.

## 2.2 Visual Results

We utilize SRResNet [3] as the underlying architecture for CNN-based image super-resolution (SR) networks. Our QuantSR-C approach is compared with DoReFa [4, 7], PAMS [4], and CADyQ [1] using 2-bit and 4-bit precision. For Transformer-based image SR networks, we adopt the lightweight SwinIR\_S [6] as the backbone. Given the increased difficulty in Transformer binarization and our observations from CNN-based methods, we exclusively apply our proposed techniques to quantize SwinIR\_S. Additionally, we present the results of our quantized Transformer baseline, QuantSR-T.

We present additional visual results in Figs. 5 and 6 for 4-bit setting and Figs. 7 and 8 for the more challenging 2-bit setting. These figures reveal that our proposed QuantSR achieves comparable or superior performance compared to other methods in most instances. Particularly in more challenging scenarios, our QuantSR outperforms other approaches, delivering the highest quality reconstructions. Comparing QuantSR to its corresponding full-precision model SwinIR\_S, we observe minimal discrepancies between them. These findings further validate the efficacy of our proposed techniques QuantSR-C and QuantSR-T.

## 3 Checklist Explanations

### 3.1 Code

We have provided code to reproduce the results in this work.

### 3.2 Limitations

We would provide more analyses about the limitations of our method. (1) Although we have further narrowed the performance gap between the low-bit quantized model and its full-precision one, the very low-bit (e.g., 2-bit) quantized model would suffer from obvious performance drops. (2) Currently, we only investigate low-bit quantization for image super-resolution. It is better to generalize the quantized networks for other image restoration applications (e.g., image denoising and deblurring).



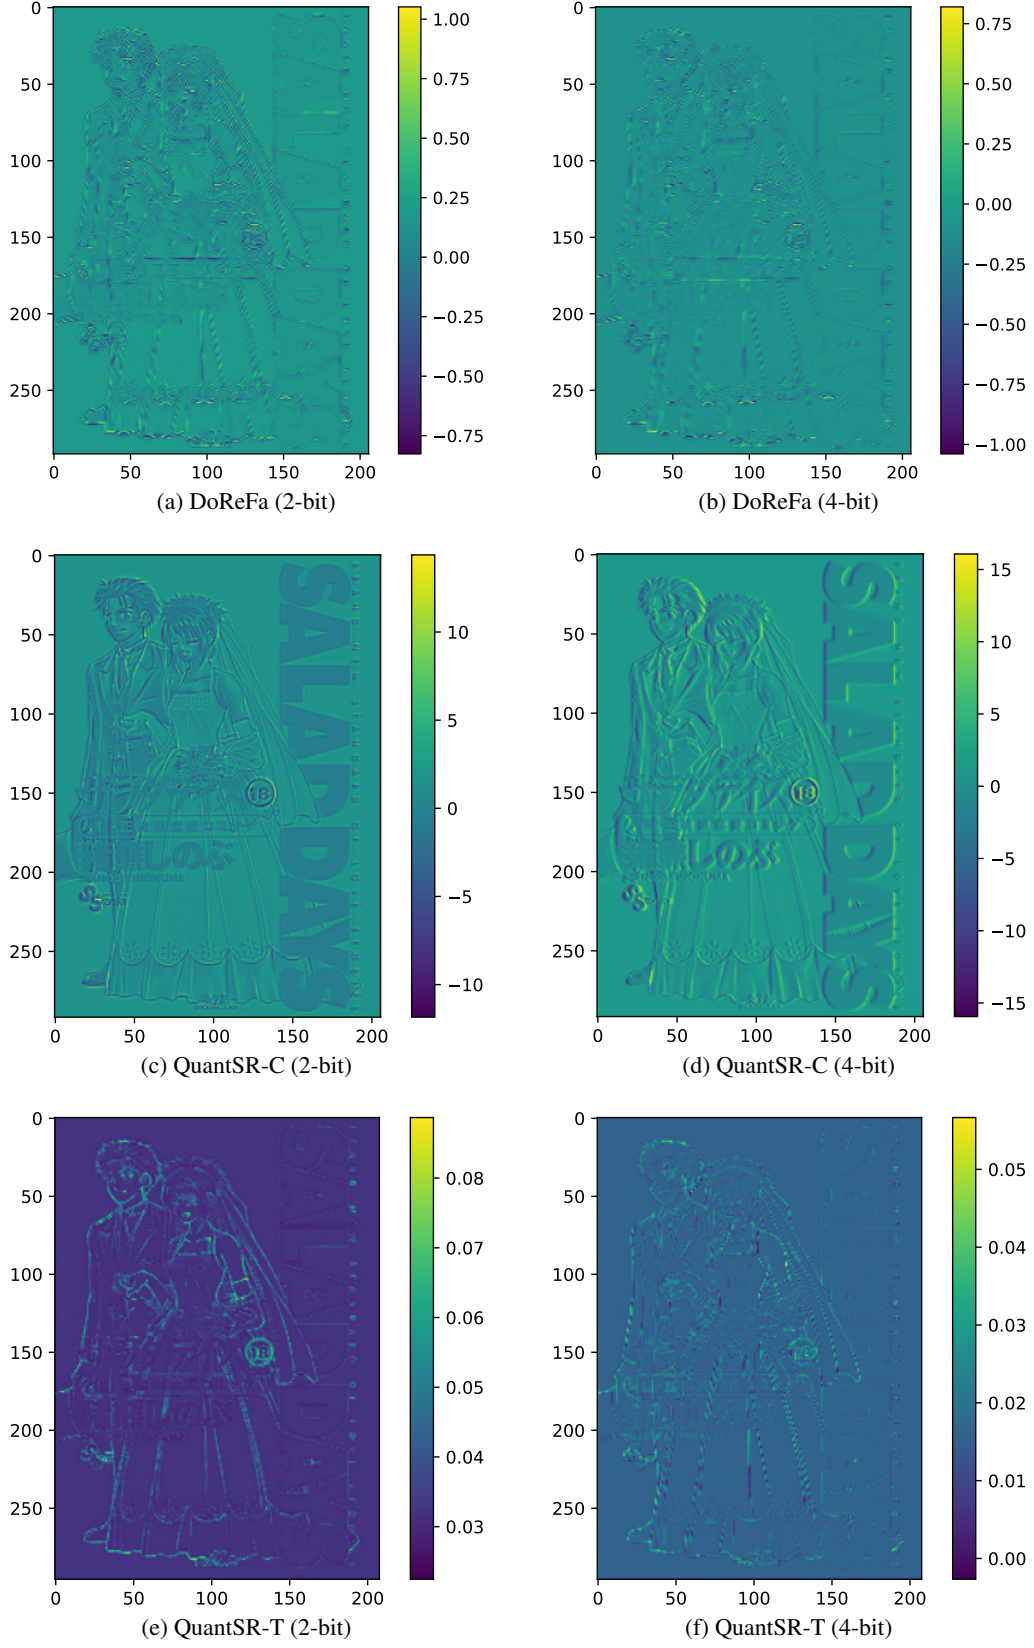

Figure 4: Feature visualization for quantized SR networks. We visualize 2- and 4-bit DoReFa, QuantSR-C, and QuantSR-T features (Test sample: SaladDays\_vol18 in Manga109 dataset).

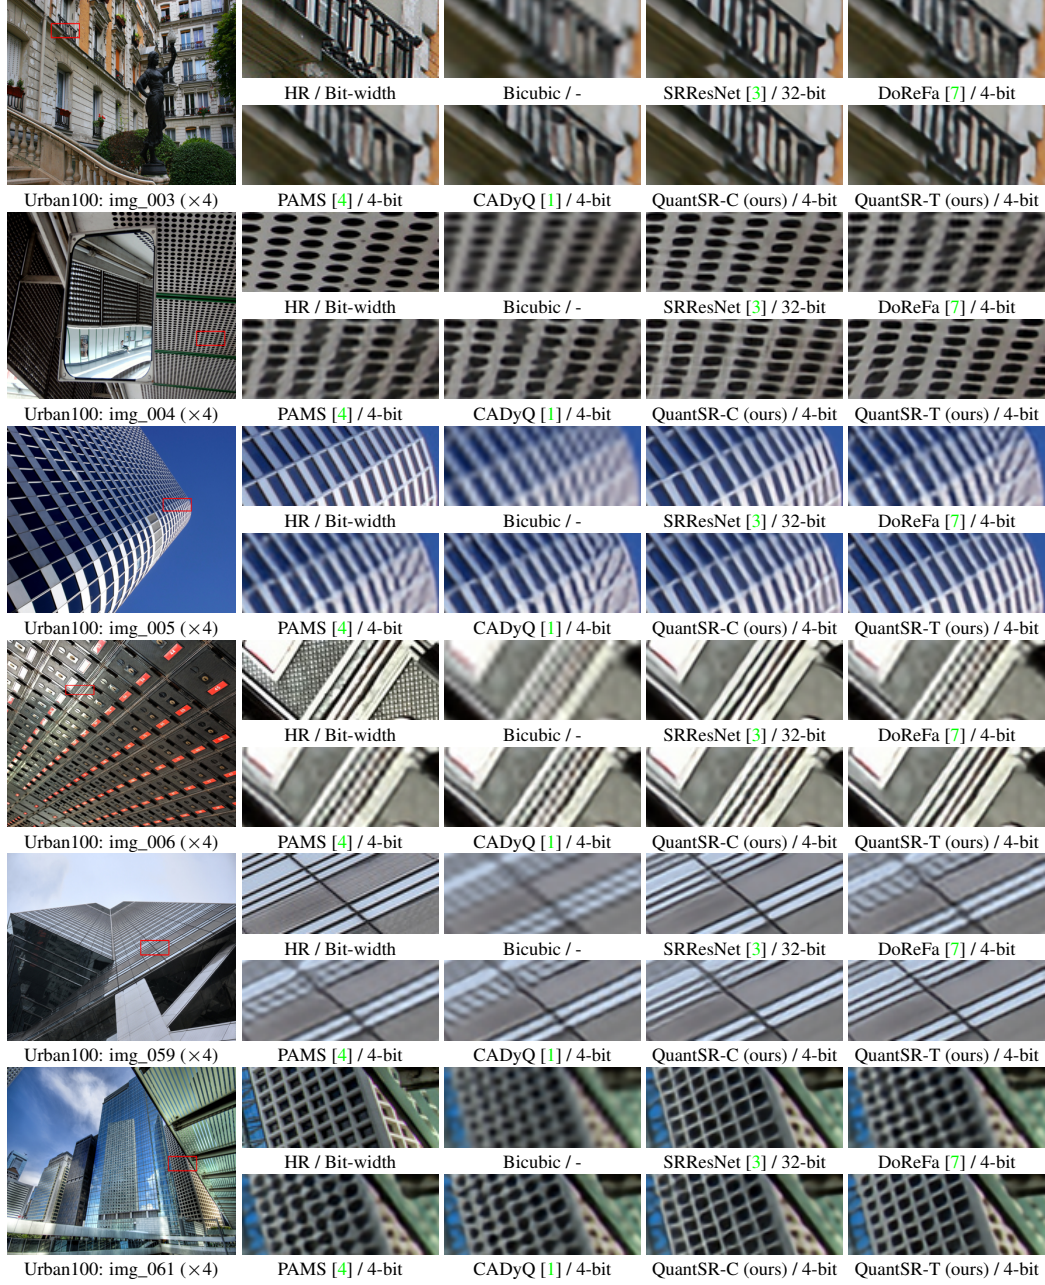

Figure 5: Visual comparison ( $\times 4$ ) with lightweight SR in terms of 4-bit.



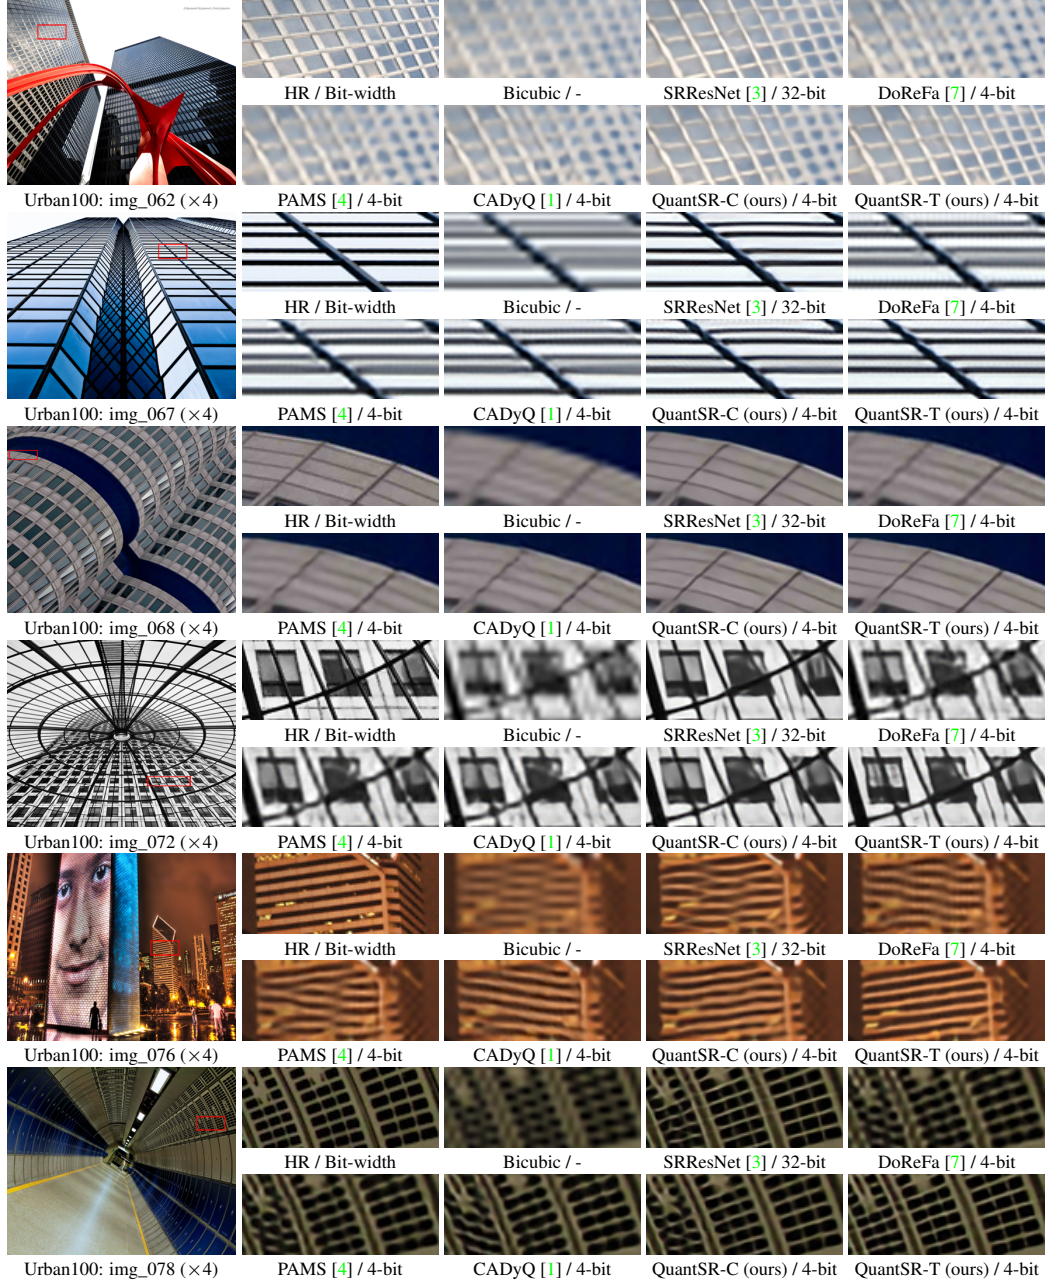

Figure 6: Visual comparison ( $\times 4$ ) with lightweight SR in terms of 4-bit.

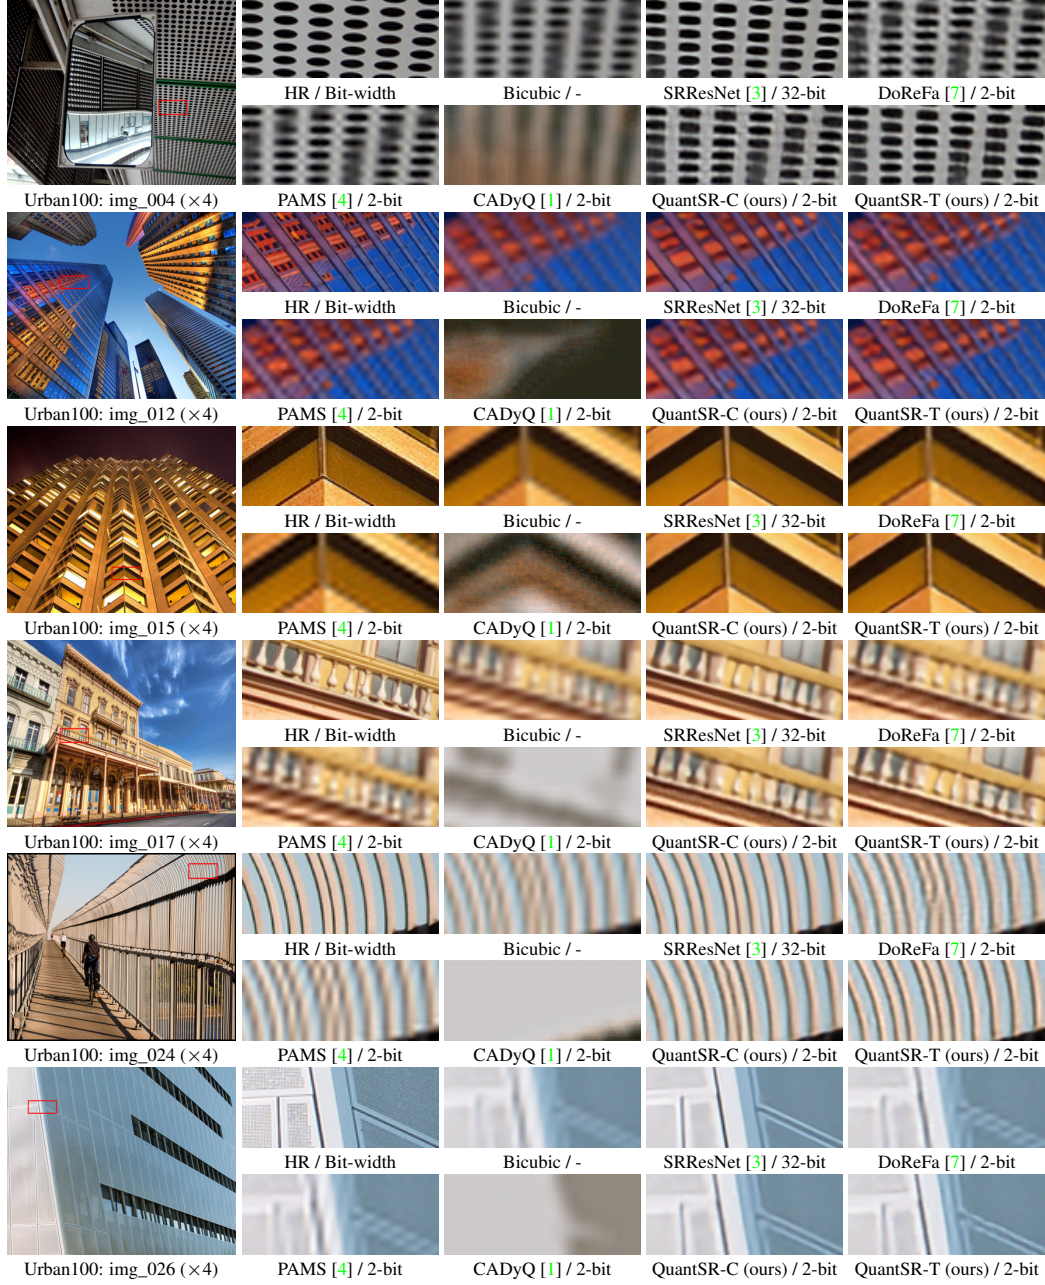

Figure 7: Visual comparison ( $\times 4$ ) with lightweight SR in terms of 2-bit.



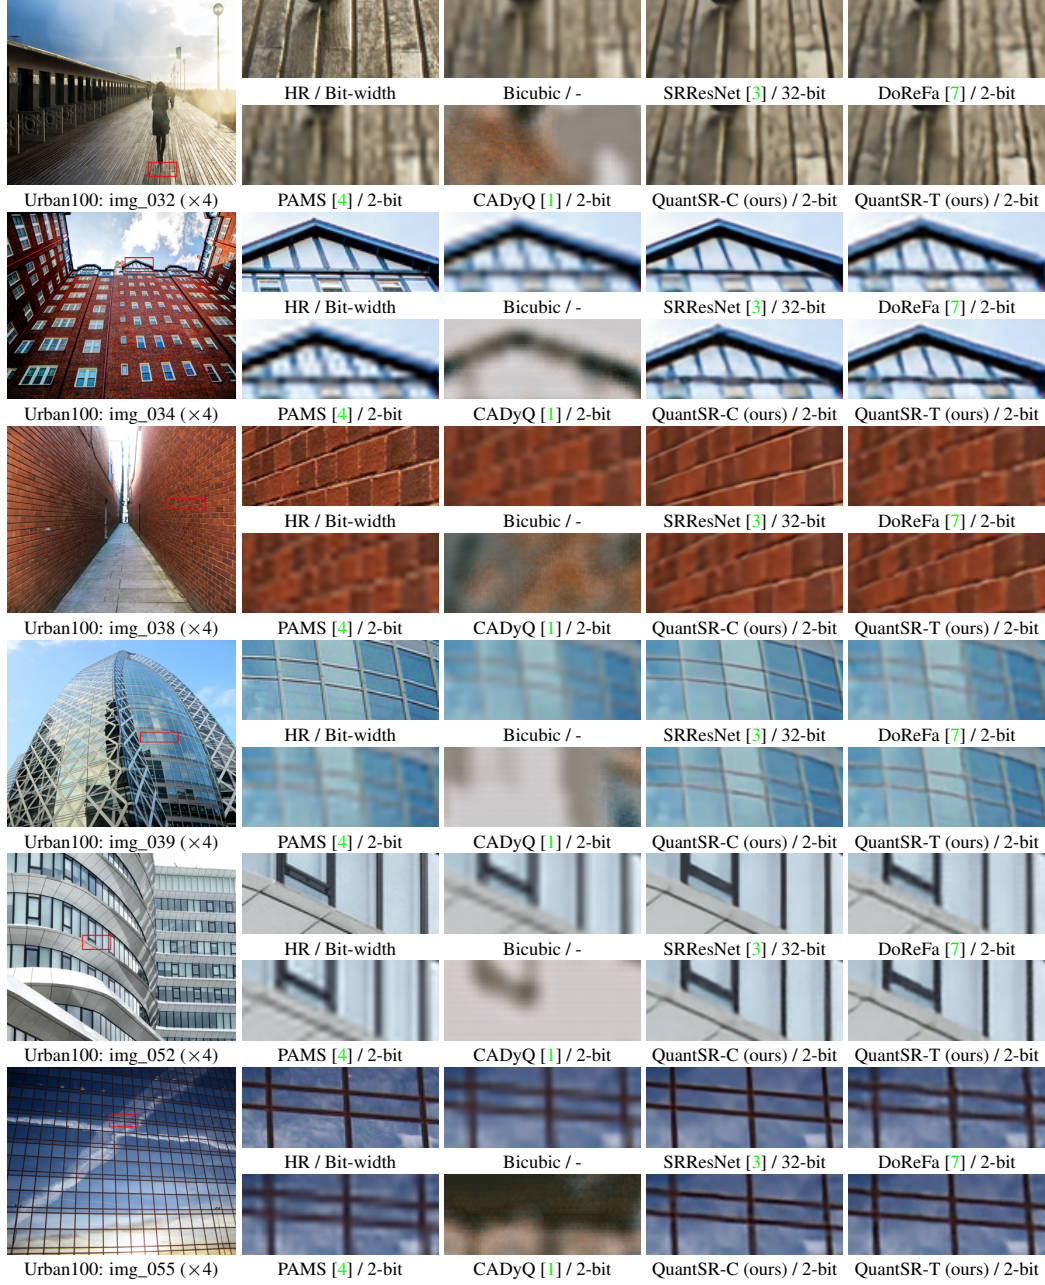

Figure 8: Visual comparison ( $\times 4$ ) with lightweight SR in terms of 2-bit.

## References

- [1] Cheeun Hong, Sungyong Baik, Heewon Kim, Seungjun Nah, and Kyoung Mu Lee. Cadyq: Content-aware dynamic quantization for image super-resolution. In *ECCV*, 2022. 4, 6, 7, 8, 9
- [2] Cheeun Hong, Sungyong Baik, Heewon Kim, Seungjun Nah, and Kyoung Mu Lee. Cadyq, 05 2023. 1
- [3] Christian Ledig, Lucas Theis, Ferenc Huszár, Jose Caballero, Andrew Cunningham, Alejandro Acosta, Andrew Aitken, Alykhan Tejani, Johannes Totz, Zehan Wang, and Wenzhe Shi. Photo-realistic single image super-resolution using a generative adversarial network. In *CVPR*, 2017. 2, 4, 6, 7, 8, 9
- [4] Huixia Li, Chenqian Yan, Shaohui Lin, Xiawu Zheng, Baochang Zhang, Fan Yang, and Rongrong Ji. Pams: Quantized super-resolution via parameterized max scale. In *ECCV*, 2020. 1, 4, 6, 7, 8, 9
- [5] Huixia Li, Chenqian Yan, Shaohui Lin, Xiawu Zheng, Baochang Zhang, Fan Yang, and Rongrong Ji. Pams, 05 2023. 1
- [6] Jingyun Liang, Jiezhang Cao, Guolei Sun, Kai Zhang, Luc Van Gool, and Radu Timofte. Swinir: Image restoration using swin transformer. In *ICCVW*, 2021. 2, 4
- [7] Shuchang Zhou, Yuxin Wu, Zekun Ni, Xinyu Zhou, He Wen, and Yuheng Zou. Dorefa-net: Training low bitwidth convolutional neural networks with low bitwidth gradients. *arXiv preprint arXiv:1606.06160*, 2016. 4, 6, 7, 8, 9
